# Supplementary material for: Occurrence of Mycotoxins in Swine Feeding from Spain
Source: PubMed Central journal article supplement (PMC6628415; doi:10.3390/toxins11060342), 2019-06-15
Supplement: toxins-11-00342-s001.pdf [file toxins-11-00342-s001.pdf]

# Supplementary Materials: Occurrence of Mycotoxins in Swine Feeding from Spain

Natalia Arroyo-Manzanares, Vicente Rodríguez-Estévez, Plácido Arenas-Fernández, Ana M. García-Campaña and Laura Gámiz-Gracia

Table S1. Monitored ions of multimycotoxins, enniatins and beauvericin, and MS/MS parameters.

| Mycotoxin | Retention Time (min) | Precursor Ion ( <i>m/z</i> ) | Molecular Ion                     | DP <sup>a</sup> | EP <sup>a</sup> | CEP <sup>a</sup> | Product Ions <sup>b</sup> | CE <sup>a</sup> | CXP <sup>a</sup> |
|-----------|----------------------|------------------------------|-----------------------------------|-----------------|-----------------|------------------|---------------------------|-----------------|------------------|
| DON       | 1.70                 | 297.1                        | [M+H] <sup>+</sup>                | 36.0            | 5.5             | 16               | 249.2(Q)                  | 17.0            | 4.0              |
|           |                      |                              |                                   |                 |                 |                  | 161.0 (I)                 | 29.0            | 4.0              |
| F-X       | 2.02                 | 355.1                        | [M+H] <sup>+</sup>                | 26.0            | 12.0            | 18               | 174.7(Q)                  | 23.0            | 4.0              |
|           |                      |                              |                                   |                 |                 |                  | 137.1 (I)                 | 31.0            | 4.0              |
| CIT       | 2.90                 | 251.2                        | [M+H] <sup>+</sup>                | 26.0            | 11.0            | 18               | 233.0 (Q)                 | 23.0            | 23.0             |
|           |                      |                              |                                   |                 |                 |                  | 204.8 (I)                 | 73.0            | 10.0             |
| HT-2      | 3.18                 | 442.0                        | [M+NH <sub>4</sub> ] <sup>+</sup> | 21.0            | 5.5             | 21               | 262.8 (Q)                 | 22.0            | 8.0              |
|           |                      |                              |                                   |                 |                 |                  | 215.4 (I)                 | 19.0            | 4.0              |
| FB1       | 3.24                 | 722.2                        | [M+H] <sup>+</sup>                | 71.0            | 10.0            | 30               | 334.2 (Q)                 | 51.0            | 6.0              |
|           |                      |                              |                                   |                 |                 |                  | 352.2 (I)                 | 47.0            | 6.0              |
| T-2       | 3.44                 | 484.0                        | [M+NH <sub>4</sub> ] <sup>+</sup> | 21.0            | 10.0            | 22               | 215.0 (Q)                 | 22.0            | 4.0              |
|           |                      |                              |                                   |                 |                 |                  | 185.0 (I)                 | 29.0            | 4.0              |
| ZEN       | 3.71                 | 319.0                        | [M+H] <sup>+</sup>                | 26.0            | 8.0             | 20               | 282.9(Q)                  | 15.0            | 10.0             |
|           |                      |                              |                                   |                 |                 |                  | 301.0 (I)                 | 19.0            | 4.0              |
| OTA       | 3.76                 | 404.0                        | [M+H] <sup>+</sup>                | 41.0            | 7.5             | 16               | 238.9 (Q)                 | 31.0            | 6.0              |
|           |                      |                              |                                   |                 |                 |                  | 102.1 (I)                 | 91.0            | 6.0              |
| FB2       | 3.86                 | 706.2                        | [M+H] <sup>+</sup>                | 71.0            | 10.5            | 20               | 336.3 (Q)                 | 43.0            | 14.0             |
|           |                      |                              |                                   |                 |                 |                  | 318.3 (I)                 | 45.0            | 12.0             |
| STE       | 3.88                 | 325.1                        | [M+H] <sup>+</sup>                | 66.0            | 3.5             | 26               | 281.0 (Q)                 | 43.0            | 23.0             |
|           |                      |                              |                                   |                 |                 |                  | 310.0 (I)                 | 37.0            | 4.0              |
| ENNB      | 2.28                 | 640.4                        | [M+H] <sup>+</sup>                | 81.0            | 8.5             | 18.0             | 196.2 (Q)                 | 35.0            | 4.0              |
|           |                      |                              |                                   |                 |                 |                  | 214.2 (I)                 | 37.0            | 4.0              |
| ENNB1     | 2.44                 | 654.4                        | [M+H] <sup>+</sup>                | 81.0            | 7.5             | 30.0             | 196.4 (Q)                 | 39.0            | 6.0              |
|           |                      |                              |                                   |                 |                 |                  | 210.1 (I)                 | 33.0            | 6.0              |
| BEA       | 2.45                 | 784.5                        | [M+H] <sup>+</sup>                | 81.0            | 9.0             | 26.0             | 244.2 (Q)                 | 39.0            | 4.0              |
|           |                      |                              |                                   |                 |                 |                  | 262.2 (I)                 | 37.0            | 4.0              |
| ENNA1     | 2.58                 | 668.4                        | [M+H] <sup>+</sup>                | 81.0            | 10.5            | 18.0             | 210.2 (Q)                 | 35.0            | 6.0              |
|           |                      |                              |                                   |                 |                 |                  | 228.2 (I)                 | 35.0            | 4.0              |
| ENNA      | 2.74                 | 682.4                        | [M+H] <sup>+</sup>                | 76.0            | 9.0             | 26.0             | 210.2 (Q)                 | 35.0            | 4.0              |
|           |                      |                              |                                   |                 |                 |                  | 228.2 (I)                 | 35.0            | 4.0              |

<sup>a</sup> Declustering potential (DP), Entrance potential (EP), Collision Cell Entrance Potential (CEP), Collision Cell Exit Potential (CXP) and Collision Energy (CE). All expressed in voltage. <sup>b</sup> Product ions: (Q) transition used for quantification, (I) Transition employed to confirm the identification.

**Table S2.** Matrix effect (%ME), recovery (%R) and recovery precision (%RSD) for multmycotoxin enniatins and beauvericin determination ( $n = 9$ ).

| Mycotoxin | Level 1 |      |      | Level 2 |      |      | Level 3 |       |      |
|-----------|---------|------|------|---------|------|------|---------|-------|------|
|           | %ME     | %R   | %RSD | %ME     | %R   | %RSD | %ME     | %R    | %RSD |
| DON       | -36.7   | 51.6 | 2.1  | -30.8   | 59.2 | 1.4  | -43.3   | 55.2  | 6.9  |
| F-X       | -21.5   | 86.8 | 4.2  | -28.8   | 90.8 | 5.5  | -25.6   | 70.5  | 5.0  |
| CIT       | -66.7   | 74.4 | 4.7  | -62.8   | 71.4 | 6.1  | -63.3   | 73.2  | 5.9  |
| HT-2      | 0.52    | 76.3 | 7.1  | -0.30   | 79.5 | 6.0  | -0.14   | 86.5  | 7.3  |
| FB1       | 10.8    | 78.3 | 4.8  | 54.1    | 72.1 | 1.1  | 7.51    | 76.1  | 5.4  |
| T-2       | -27.8   | 82.9 | 5.5  | -13.9   | 83.2 | 6.1  | -9.51   | 77.5  | 5.9  |
| ZEA       | -37.7   | 84.2 | 6.1  | -35.1   | 85.2 | 4.8  | -44.4   | 92.1  | 5.9  |
| OTA       | -57.2   | 97.2 | 7.2  | -60.8   | 95.1 | 6.7  | -57.4   | 68.0  | 8.7  |
| STE       | -80.3   | 80.4 | 4.4  | -77.1   | 86.5 | 7.0  | -85.6   | 79.3  | 7.1  |
| FB2       | -9.3    | 73.6 | 4.2  | 7.84    | 77.1 | 3.6  | -7.70   | 73.5  | 1.5  |
| ENNB      | -31.7   | 93.3 | 1.4  | -70.4   | 99.7 | 0.9  | -62.9   | 98.1  | 0.4  |
| ENNB1     | -73.6   | 93.4 | 1.1  | -76.2   | 97.6 | 1.5  | -71.5   | 100.2 | 1.3  |
| BEA       | -93.8   | 95.6 | 3.8  | -94.6   | 99.0 | 1.0  | -93.0   | 100.3 | 0.3  |
| ENNA1     | -82.5   | 97.5 | 1.4  | -83.5   | 99.1 | 1.0  | -80.2   | 99.6  | 0.2  |
| ENNA      | -89.0   | 98.2 | 0.3  | -88.9   | 97.3 | 0.4  | -86.6   | 99.7  | 2.3  |

Level 1 = OTA, STE: 10  $\mu\text{g kg}^{-1}$ ; HT-2, T-2, FB1, FB2, CIT: 50  $\mu\text{g kg}^{-1}$ ; ZEA: 100  $\mu\text{g kg}^{-1}$ ; F-X: 200 DON: 250  $\mu\text{g kg}^{-1}$ ; ENNA, ENNA1, ENNB, ENNB1, BEA: 20  $\mu\text{g kg}^{-1}$ . Level 2 = OTA, STE: 50  $\mu\text{g kg}^{-1}$ ; HT-2, T-2, FB1, FB2, ZEA, CIT: 250  $\mu\text{g kg}^{-1}$ ; F-X, DON: 500  $\mu\text{g kg}^{-1}$ ; ENNA, ENNA1, ENNB, ENNB1, BEA: 100  $\mu\text{g kg}^{-1}$ . Level 3 = OTA, STE: 100  $\mu\text{g kg}^{-1}$ ; HT-2, T-2, FB1, FB2, ZEA, CIT: 500  $\mu\text{g kg}^{-1}$ ; F-X: 1000 DON: 750  $\mu\text{g kg}^{-1}$ ; ENNA, ENNA1, ENNB, ENNB1, BEA: 200  $\mu\text{g kg}^{-1}$ .

**Table S3.** Precision study for multimycotoxin, enniatins and beauvericin determination at different concentration levels ( $n = 9$ ).

| Mycotoxin | Intraday Precision, RSD% |         |         | Interday Precision, RSD% |         |         |
|-----------|--------------------------|---------|---------|--------------------------|---------|---------|
|           | Level 1                  | Level 2 | Level 3 | Level 1                  | Level 2 | Level 3 |
| DON       | 2.1                      | 1.4     | 6.9     | 8.2                      | 7.6     | 8.9     |
| F-X       | 4.2                      | 5.5     | 5.0     | 10                       | 10      | 4.6     |
| CIT       | 4.7                      | 6.0     | 5.9     | 6.8                      | 7.4     | 8.0     |
| HT-2      | 7.1                      | 6.0     | 7.3     | 4.2                      | 9.8     | 8.5     |
| FB1       | 4.8                      | 1.1     | 5.4     | 4.3                      | 3.5     | 7.8     |
| T-2       | 5.5                      | 6.1     | 5.9     | 2.1                      | 2.2     | 3.1     |
| ZEA       | 6.1                      | 4.8     | 5.9     | 9.8                      | 7.1     | 8.3     |
| OTA       | 7.2                      | 6.7     | 8.7     | 6.4                      | 1.2     | 3.3     |
| STE       | 4.4                      | 7.0     | 7.1     | 3.4                      | 7.5     | 6.3     |
| FB2       | 4.2                      | 3.6     | 1.5     | 5.4                      | 5.9     | 7.3     |
| ENNB      | 1.4                      | 0.92    | 0.45    | 4.0                      | 3.5     | 4.0     |
| ENNB1     | 1.1                      | 1.5     | 1.3     | 4.6                      | 4.8     | 5.0     |
| BEA       | 3.8                      | 1.0     | 0.34    | 5.8                      | 4.3     | 3.8     |
| ENNA1     | 1.4                      | 1.1     | 2.3     | 5.8                      | 4.3     | 4.9     |
| ENNA      | 0.29                     | 0.38    | 0.18    | 4.8                      | 3.3     | 4.9     |

Level 1 = OTA, STE: 10  $\mu\text{g kg}^{-1}$ ; HT-2, T-2, FB1, FB2, CIT: 50  $\mu\text{g kg}^{-1}$ ; ZEA: 100  $\mu\text{g kg}^{-1}$ ; F-X: 200 DON: 250  $\mu\text{g kg}^{-1}$ ; ENNA, ENNA1, ENNB, ENNB1, BEA: 20  $\mu\text{g kg}^{-1}$ . Level 2 = OTA, STE: 50  $\mu\text{g kg}^{-1}$ ; HT-2, T-2, FB1, FB2, ZEA, CIT: 250  $\mu\text{g kg}^{-1}$ ; F-X, DON: 500  $\mu\text{g kg}^{-1}$ ; ENNA, ENNA1, ENNB, ENNB1, BEA: 100  $\mu\text{g kg}^{-1}$ . Level 3 = OTA, STE: 100  $\mu\text{g kg}^{-1}$ ; HT-2, T-2, FB1, FB2, ZEA, CIT: 500  $\mu\text{g kg}^{-1}$ ; F-X: 1000 DON: 750  $\mu\text{g kg}^{-1}$ ; ENNA, ENNA1, ENNB, ENNB1, BEA: 200  $\mu\text{g kg}^{-1}$ .
